# Supplementary material
Source: Research Square preprint supplement (doi:10.21203/rs.3.rs-9240026/v1)
Supplement: Supplementary file 1 [file 10f935deb3005d8525d3a6d7.docx]

## Multimedia Appendix 1. CREDES Checklist (Conducting and REporting DElphi Studies)

| # | CREDES Item | Reported? | Location in Manuscript |
| --- | --- | --- | --- |
| 1. Justification for the choice of the Delphi technique | | | |
| 1a | Rationale for using the Delphi technique | Yes | Methods 2.1 |
| 1b | Description of the specific variant used (Modified Delphi with initial workshop) | Yes | Methods 2.1 |
| 1c | Explanation of how the Delphi was modified and why | Yes | Methods 2.1 |
| 2. Planning and design | | | |
| 2a | Prior definition of goals and objectives | Yes | Introduction (Research Questions) |
| 2b | Description of criteria for identifying the target group | Yes | Methods 2.2 |
| 2c | Sample size determination or rationale | Yes | Methods 2.2 (rationale based on prior Delphi studies and recommended range of 15-30) |
| 3. Study conduct — Expert panel | | | |
| 3a | Description of experts and their qualifications | Yes | Methods 2.2, Table 1 |
| 3b | Number of experts invited, agreed, participated per round | Yes | Methods 2.2, Figure 1 |
| 3c | Information on attrition and reasons | Yes | Methods 2.2, Figure 1 |
| 3d | Description of recruitment process | Yes | Methods 2.2 |
| 4. Study conduct — Questionnaire development | | | |
| 4a | Description of how the questionnaire was developed | Yes | Methods 2.3 |
| 4b | Description of the literature review basis | Yes | Methods 2.3 |
| 4c | Description of pilot testing | Yes | Methods 2.3 (pilot review by 3 experts for clarity, content validity, and response time) |
| 4d | Response format and scales used | Yes | Methods 2.3 |
| 5. Study conduct — Survey design | | | |
| 5a | Number of rounds | Yes | Methods 2.1 (3 rounds) |
| 5b | Mode of administration per round | Yes | Methods 2.4 |
| 5c | Description of feedback between rounds | Yes | Methods 2.4 |
| 5d | Time frame for each round | Yes | Methods 2.4 |
| 6. Study conduct — Process regulation (consensus criteria) | | | |
| 6a | Prior definition of consensus criteria | Yes | Methods 2.5 |
| 6b | Description of consensus thresholds | Yes | Methods 2.5 (IQR, CV thresholds) |
| 6c | Criteria for including/excluding/modifying items between rounds | Yes | Methods 2.5 |
| 6d | Criteria for stopping | Yes | Methods 2.5 (3 rounds pre-specified) |
| 7. Study conduct — Analyses | | | |
| 7a | Statistical methods used | Yes | Methods 2.5 |
| 7b | Handling of missing data | Yes | Methods 2.5 |
| 7c | Software used for analysis | Yes | Methods 2.5 |
| 8. Results | | | |
| 8a | Response rates per round | Yes | Results 3.2, 3.3, Figure 1 |
| 8b | Descriptive statistics per item per round | Yes | Tables 2-4, Multimedia Appendices 6-7 |
| 8c | Consensus results per item per round | Yes | Results 3.2, 3.3 |
| 8d | Final list of consensus/non-consensus items | Yes | Results 3.4 |
| 9. Discussion | | | |
| 9a | Interpretation of results in context of prior work | Yes | Discussion 4.2 |
| 9b | Discussion of methodological strengths and limitations | Yes | Discussion 4.7 |
| 9c | Discussion of expert panel composition | Yes | Discussion 4.7 |
| 10. Methods reflection and Ethics | | | |
| 10a | Critical reflection on the Delphi process | Yes | Discussion 4.7 |
| 10b | Ethical approval | Yes | Methods 2.6 |
| 10c | Informed consent | Yes | Methods 2.6 |

**Notes**

1. Based on: Jünger S, Payne SA, Brine J, Radbruch L, Brearley SG. Guidance on Conducting and REporting DElphi Studies (CREDES) in palliative care. Palliat Med. 2017;31(8):684-706.

## Multimedia Appendix 2: Full Questionnaire

## Delphi Survey for Developing Research Ethics Guidelines for Generative AI in Digital Healthcare

## Part A. Demographic Questions

| ID | Question | Response Format |
| --- | --- | --- |
| D1 | What is your gender? | Male / Female |
| D2 | Please specify your primary professional field | Open-ended |
| D3 | How long have you been working in this field? | Less than 5 years / 5-10 years / 10-20 years / More than 20 years |
| D4 | Rate your direct experience with generative AI (e.g., ChatGPT, Claude, Gemini, etc.) | Beginner / Intermediate / Advanced / Expert |
| D5 | Have you served on an IRB or similar ethics oversight body? | Yes / No |
| D6 | Select all positions that apply | Multiple Selection — See below |

**D6 Position Options (Multiple Selection):**

| Code | Position |
| --- | --- |
| P1 | Clinical Physician |
| P2 | AI/ML Researcher or Developer |
| P3 | Data Scientist |
| P4 | Bioethicist |
| P5 | Legal or Regulatory Expert |
| P6 | IRB Expert or Member |
| P7 | Patient Advocacy Group |
| P8 | Pharmaceutical/MedTech Industry Researcher |
| P9 | Healthcare Policy Researcher |
| P10 | Non-AI Researcher — Humanities, Social Sciences, Health Sciences |

## Part B. Round 2 Questionnaire, 56 Items*

Response Scale: 7-point Likert (1 = Not important at all, 7 = Very important), unless otherwise noted.

### Domain 1. Data Protection — 7 Items

**Q 1.1.** Please rate the importance of the following technical and procedural controls for protecting patient data used in training, validation, and testing of generative AI models.

| Item | Question |
| --- | --- |
| Q1.1.1 | Differential Privacy |
| Q1.1.2 | Federated Learning |
| Q1.1.3 | Secure Multi-Party Computation |
| Q1.1.4 | Homomorphic Encryption |
| Q1.1.5 | Strict Data Access Protocol |
| Q1.1.6 | Network Segmentation |
| Q1.1.7 | Contractual Liability for Third-Party Tool Use |

### Domain 2. Evaluation Methods — 6 Items

**Q 1.2.** Please rate the importance of the following evaluation and verification methods for ensuring the accuracy and reliability of information generated by generative AI.

| Item | Question |
| --- | --- |
| Q1.2.1 | LLM-as-Judge |
| Q1.2.2 | Verification Benchmark |
| Q1.2.3 | Expert Validation |
| Q1.2.4 | Patient Validation |
| Q1.2.5 | Prompt Robustness |
| Q1.2.6 | Result Reproducibility |

### Domain 3. Safety Measures — 6 Items

**Q 1.3.** Given the difference between statistical models and clinical reasoning, please rate the importance of the following safeguards for ensuring patient safety when using generative AI.

| Item | Question |
| --- | --- |
| Q1.3.1 | AI Output Reliance Score |
| Q1.3.2 | Uncertainty Quantification Standard |
| Q1.3.3 | Decision Boundary Setting |
| Q1.3.4 | Explicit Explanation of AI Reasoning |
| Q1.3.5 | Explicit Documentation of AI Design |
| Q1.3.6 | Use Category Limitation |

### Domain 4. Documentation Standards — 5 Items

**Q 2.2.** Please rate the importance of the following standard documents required for AI evaluation.

| Item | Question |
| --- | --- |
| Q2.2.1 | Model Card |
| Q2.2.2 | Data Source Documentation |
| Q2.2.3 | Bias Audit Report |
| Q2.2.4 | Data Security Plan |
| Q2.2.5 | Continuous Monitoring Plan |

### Domain 5. Liability Distribution — 6 Items

**Q 2.3.** When harm occurs to research participants due to generative AI errors, please rate the importance of each actor's role in assuming legal responsibility.

| Item | Question |
| --- | --- |
| Q2.3.1 | Principal Researcher-Led Responsibility |
| Q2.3.2 | Healthcare Professional-Led Responsibility |
| Q2.3.3 | Developer-Led Responsibility |
| Q2.3.4 | Institution-Led Responsibility |
| Q2.3.5 | Funding Agency-Led Responsibility |
| Q2.3.6 | Shared Responsibility Model |

### Domain 6. Monitoring Initiatives — 6 Items

**Q 2.4.** Please rate the importance of each actor in continuous monitoring processes following the approval of generative AI.

| Item | Question |
| --- | --- |
| Q2.4.1 | Researcher-Led Monitoring |
| Q2.4.2 | Healthcare Professional-Led Monitoring |
| Q2.4.3 | Developer-Led Monitoring |
| Q2.4.4 | Institution-Led Monitoring |
| Q2.4.5 | Funding Agency-Led Monitoring |
| Q2.4.6 | Shared Responsibility Model |

### Domain 7. Explainability Requirements — 7 Items

**Q 2.5.** Please rate the importance of AI explainability in the following healthcare application areas.

| Item | Question |
| --- | --- |
| Q2.5.1 | Clinical Decision Support |
| Q2.5.2 | Diagnosis Support |
| Q2.5.3 | Clinical Test Support |
| Q2.5.4 | Surgery Support |
| Q2.5.5 | Hospitalization Support |
| Q2.5.6 | Patient Monitoring Support |
| Q2.5.7 | Hospital Administration |

### Domain 8. Bias Effects — 7 Items

Response Scale: 3-point ranking (1 = Most problematic, 3 = Least problematic)

**Q 3.1.** Please rank the following sources of bias by severity.

| Item | Question |
| --- | --- |
| Q3.1.1 | Non-Representative Training Data |
| Q3.1.2 | Clinical Language Bias |
| Q3.1.3 | Textbook and Educational Material Bias |
| Q3.1.4 | Measurement Tool Bias |
| Q3.1.5 | Human Labelling Bias |
| Q3.1.6 | Proxy Variable Bias |
| Q3.1.7 | Patient-Clinician Interaction Bias |

### Additional Questions: Bias Monitoring — 5 Items

**Q 3.2.** Please rate the importance of the following bias auditing methods and timing.

| Item | Question |
| --- | --- |
| Q3.2.1 | Data Bias Inspection and Correction |
| Q3.2.2 | Developer and Researcher Bias Training |
| Q3.2.3 | Internal Audit-Based Bias Review |
| Q3.2.4 | External Audit Data-Based Bias Verification |
| Q3.2.5 | Usage-Related Bias — Interface, Comprehension, Application |

### Domain 9. Value Alignment Priorities — 6 Items

Response Scale: 6-point ranking (1 = Highest priority, 6 = Lowest priority)

Please rank the following mechanisms for healthcare AI value alignment by priority.

| Item | Question |
| --- | --- |
| Q3.3.1 | Patient-Centered Value Priority |
| Q3.3.2 | Medical Accuracy Value Priority |
| Q3.3.3 | Effectiveness Value Priority |
| Q3.3.4 | Social Value Integration Procedures |
| Q3.3.5 | Stakeholder Value Integration Procedures |
| Q3.3.6 | Value Balancing |

### Additional Question: Monitoring Institution — 1 Item

**Q 2.1.** Which institution do you consider most appropriate for overseeing generative AI?

- Hospital itself
- IRB (Institutional Review Board)
- Government agency
- Professional society
- Other

* The questionnaires were reordered after Round 2 based on the discussion of the results and domain selection.

## Part C. Round 3 Questionnaire (43 Items + Multiple Selection)

Round 3 was conducted with feedback from Round 2 analysis results, including re-evaluation of items with reserved consensus and operational sub-items derived from Round1-2 discussions.

Response Scale: 7-point Likert (1 = Not important at all, 7 = Very important)

### Q1. Verification Methods — 1 Item

Please rate the importance of the following method for verifying the accuracy and reliability of medical information generated by generative AI.

| Item | Question |
| --- | --- |
| Q1-1 | Verification Benchmark |

### Q2. Patient Safety Measures — 2 Items

Given the difference between statistical models and clinical reasoning, please rate the importance of the following safeguards for patient safety when using generative AI.

| Item | Question |
| --- | --- |
| Q2-1 | AI Output Reliance Score |
| Q2-2 | Decision Boundary Setting |

### Q3. Documentation Standards — 2 Items

Please rate the importance of the following documents required for generative AI evaluation.

| Item | Question |
| --- | --- |
| Q3-1 | Data Security Plan |
| Q3-2 | Continuous Monitoring Plan |

### Q4. Liability Attribution — 3 Items

When harm occurs to research participants/patients due to generative AI errors, who should bear primary responsibility?

| Item | Question |
| --- | --- |
| Q4-1 | Healthcare Professional-Led |
| Q4-2 | Institution-Led |
| Q4-3 | Developer-Led |

### Q5. Shared Responsibility Model — 1 Item

Please rate the importance of the shared responsibility model in monitoring post-approval performance changes.

| Item | Question |
| --- | --- |
| Q5-1 | Shared Responsibility Model |

### Q6. Explainability Application Areas — 3 Items

Please rate the importance of explainability in the following healthcare areas where AI explanation is essential.

| Item | Question |
| --- | --- |
| Q6-1 | Surgery Support |
| Q6-2 | Patient Monitoring Support |
| Q6-3 | Hospital Administration |

### Q7. Emerging Ethical Issues in the AI Era — 10 Items

The following ten ethical issues have emerged in the AI era. Each issue is paired with its most relevant ethical principles. Please rate how important the stated principle is in each context.

| Item | Question | Related Principles |
| --- | --- | --- |
| Q7-1 | Granting humans priority to override/modify AI recommendations | Autonomy + Beneficence |
| Q7-2 | Preventing distortion of participant decision-making through hypersuasion | Autonomy + Beneficence |
| Q7-3 | Explainable AI | Autonomy + Beneficence |
| Q7-4 | Human-in-the-Loop | Autonomy + Beneficence |
| Q7-5 | Mitigating clinical deskilling | Beneficence + Justice |
| Q7-6 | Preventing research trust erosion | Beneficence + Justice |
| Q7-7 | Establishing a healthcare governance deliberation committee | Beneficence + Justice |
| Q7-8 | Healthcare AI literacy | Beneficence + Justice |
| Q7-9 | Prioritizing existing clinical workflows vs. AI-driven workflow innovation | Autonomy + Justice |
| Q7-10 | Third-party use of data and platforms | Autonomy + Justice |

### Q8. Expert Verification — 4 Likert Items + 5 Multiple Selection Items

**Q8-1.** At which stages should expert verification be conducted? (Multiple selections allowed.)

| Item | Verification Stage |
| --- | --- |
| Q8-1-1 | Development stage — algorithm design |
| Q8-1-2 | Training stage — model training |
| Q8-1-3 | Validation stage — performance evaluation |
| Q8-1-4 | Pre-deployment — final approval |
| Q8-1-5 | Post-deployment — continuous monitoring |

**Q8-2.** What qualifications should AI verification experts have?

| Item | Question |
| --- | --- |
| Q8-2-1 | Clinical specialty qualification — e.g., pulmonologist for pneumonia diagnosis AI |
| Q8-2-2 | Technical understanding of AI/ML |
| Q8-2-3 | Specialized training in medical AI evaluation |
| Q8-2-4 | Research ethics training completion |

### Q9. Causal Analysis and Shared Responsibility — 5 Likert Items + 1 Open-Ended

**Q9-1.** In a shared responsibility model, which elements should be included in causal analysis to determine each stakeholder's share of responsibility?

| Item | Question |
| --- | --- |
| Q9-1-1 | Adequacy of AI model design and training data |
| Q9-1-2 | Validity of research design and AI utilization protocol |
| Q9-1-3 | Verification and monitoring system for AI outputs |
| Q9-1-4 | Informed consent process for research participants |
| Q9-1-5 | AI system deployment and maintenance system |

**Q9-2.** What institutional mechanisms should be implemented to realize a shared responsibility model in healthcare research environments? (Open-ended.)

### Q10. Bias Management — 12 Items

**Q10-1.** Which of the following types of bias should be prioritized for management in healthcare AI? Please rate each.

| Item | Question |
| --- | --- |
| Q10-1-1 | Demographic bias — performance differences by gender, race, age |
| Q10-1-2 | Socioeconomic bias — discrimination by income, insurance type, residential area |
| Q10-1-3 | Disease type bias — poor performance for rare diseases and atypical symptoms |
| Q10-1-4 | Data collection bias — data collected only from specific institutions/regions |
| Q10-1-5 | Historical bias — past healthcare discrimination reflected in data |
| Q10-1-6 | Algorithmic bias — systematic errors in model design and training |

**Q10-2.** Please rate the importance of the following methods for managing bias in medical research using generative AI.

| Item | Question |
| --- | --- |
| Q10-2-1 | Training data diversity — inclusion of data from diverse populations and institutions |
| Q10-2-2 | Regular bias assessment and monitoring — mandatory subgroup performance evaluation |
| Q10-2-3 | Bias mitigation algorithm application — reweighting, fairness constraints, etc. |
| Q10-2-4 | Multidisciplinary expert review — collaborative review by clinicians, ethicists, statisticians |
| Q10-2-5 | Transparency and explainability — disclosure of bias risks and performance limitations |
| Q10-2-6 | User education and guidelines — training on bias recognition and response) |

## Multimedia Appendix 3: Complete Ethics Guideline and Checklist

## Ethical Guidelines

### 1. Data Domain

**Privacy:** *Protection measures must be established for data used in training and operating generative AI models.*

**Trust:** *The accuracy and reliability of information generated by generative AI must be ensured.*

**Safety:** *The impact of generative AI on patient safety must be considered, and potential risks must be minimized.*

### 2. Governance Domain

### Forward-looking Responsibility

**Monitoring Institutions:** *Institutions that oversee ethical compliance in generative AI research and development must be clearly established.*

**Documentation Standards:** *Standardized documentation must be created and disclosed throughout the generative AI research and development process.*

### Backward-looking Responsibility

**Liability:** *Liability for compensating damages arising from the use of generative AI must be clearly defined.*

**Post-deployment Monitoring Procedures:** *Monitoring must continue even when generative AI is used in real-world environments after research and development.*

### 3. Design-by-Value Domain

**Explainability:** *The model or system must provide explanations for the generative AI's decision-making process.*

**Debiasing:** *Biases in data, models, or systems must be reviewed and measures must be taken to minimize them.*

**Alignment:** *Generative AI must be designed to align with ethical values and goals in healthcare.*

## Checklist Legend

- **[Pre-Dev]**: Pre-development stage
- **[During]**: During development stage
- **[Post-Dev]**: Post-deployment stage
- **[All]**: All stages
- **★**: Must-have (mandatory compliance)
- **◆**: Should-have (strongly recommended)
- **○**: Nice-to-have (situational application)

## Table A: Core Checklist

| Domain | Phase | Checklist Item | Priority | Difficulty | Check | Application Examples |
| --- | --- | --- | --- | --- | --- | --- |
| 1. Privacy | Pre-Dev | Strict data access protocols | ★ | Med | ☐ | PACS access control (imaging), sensitive records protection (psychiatry) |
|  | Pre-Dev | Network separation (air-gapping) | ★ | High | ☐ | Internal-external network separation, on-premises environment |
|  | Pre-Dev | Contractual liability for 3rd party sharing | ★ | Med | ☐ | Multi-center data sharing contracts, API service agreements |
|  | Pre-Dev | Restrict AI agent data/system access by least privilege (Agentic AI) | ★ | Med | ☐ | Per-agent access control, API call scope limitation |
|  | During | Data protection verification benchmarks | ◆ | High | ☐ | Re-identification risk assessment (genomics), de-identification validation (EMR) |
|  | During | Privacy technologies (SMPC, Homomorphic Encryption) | ● | High | ☐ | Federated learning (multi-center) |
| 2. Trust | During | Expert verification of generated info | ★ | Med | ☐ | Specialist review of readings (imaging), diagnosis verification (pathology) |
|  | During | Prompt robustness review | ★ | Med | ☐ | Adversarial prompt testing, jailbreak prevention (chatbot) |
|  | During | Reproducibility check | ◆ | Med | ☐ | Output consistency test for identical inputs (diagnosis) |
|  | During | Hallucination detection/mitigation procedures | ★ | High | ☐ | RAG-based verification, multi-LLM cross-review, fact-check module |
|  | Post-Dep | Verification benchmarks for generated info | ◆ | High | ☐ | Regular performance evaluation, drift monitoring |
|  | Post-Dep | Hallucination case collection and analysis | ◆ | Med | ☐ | Error case DB, pattern analysis for model improvement |
|  | Post-Dep | Patient notification/consent for AI involvement (Agentic AI) | ★ | Med | ☐ | AI involvement noted in treatment consent forms |
| 3. Safety | Pre-Dev | Clear definition/limit of use scope | ★ | Low | ☐ | Triage assistance only (emergency), crisis counseling exclusion (psychiatry) |
|  | Pre-Dev | Define AI agent autonomy level and decision scope (Agentic AI) | ★ | Med | ☐ | Permitted action list, prohibited action definition |
|  | Pre-Dev | Assess cascading failure potential (Agentic AI) | ★ | High | ☐ | Failure propagation scenario analysis, isolation mechanism design |
|  | During | Decision boundaries & user approval protocols | ★ | Med | ☐ | Mandatory physician confirmation for high-risk prescriptions |
|  | During | Explicit explainability of reasoning | ◆ | High | ☐ | CAM visualization (imaging), feature highlighting (pathology) |
|  | During | Explicit design documentation | ★ | Low | ☐ | Architecture, training parameters, dataset specification documentation |
|  | During | Standards for quantifying output uncertainty | ★ | High | ☐ | Confidence intervals, uncertain case flagging (diagnosis) |
|  | During | Reliability scales for outputs | ◆ | Med | ☐ | Response confidence display (chatbot), reading certainty score (imaging) |
|  | During | Hallucination patient safety risk minimization safeguards | ★ | Med | ☐ | Restrict standalone AI in high-risk decisions, uncertainty warnings |
|  | During | Mandatory HITL for high-risk decisions (Agentic AI) | ★ | Med | ☐ | Mandatory physician final approval for diagnosis/prescription |
|  | During | Multi-agent interaction supervision/coordination (Agentic AI) | ◆ | High | ☐ | Inter-agent communication protocol, conflict resolution rules |
|  | During | Zero Trust architecture consideration | ◆ | High | ☐ | Verify all access requests, microsegmentation |
| 4. Fwd Responsibility (Monitoring) | All | Compliance with gov. ethical supervision | ★ | Low | ☐ | KDCA, MFDS guideline compliance verification |
|  | All | Compliance with IRB review & oversight | ★ | Low | ☐ | Research protocol IRB submission and approval, periodic reporting |
| 5. Fwd Responsibility (Docs) | Pre-Dev | Specification of all data sources | ★ | Low | ☐ | Public datasets, hospital data, external API source specification |
|  | During | Data security plan | ★ | Med | ☐ | Encryption methods, access control, disposal procedure documentation |
|  | During | Traceable logging of AI agent autonomous actions (Agentic AI) | ★ | Med | ☐ | Immutable logging, action timestamps, decision rationale storage |
|  | Post-Dep | Public release of Model Card | ◆ | Med | ☐ | Performance metrics, limitations, appropriate use scope |
|  | Post-Dep | Audit report on model bias | ◆ | High | ☐ | Performance gap analysis by gender, age, ethnicity |
|  | Post-Dep | Continuous monitoring plan | ★ | Med | ☐ | Monitoring cycle, retraining criteria |
| 6. Bwd Responsibility (Liability) | Pre-Dev | Review of shared liability protocols | ★ | Med | ☐ | Developer-institution-user liability sharing agreement |
|  | During | Responsible R&D execution (liability awareness) | ★ | Low | ☐ | Role-based responsibility clarification within research team |
| 7. Bwd Responsibility (Post-Monitor) | Post-Dep | User feedback collection/analysis process | ★ | Med | ☐ | Inaccurate response reporting (chatbot), error report system (CDSS) |
|  | Post-Dep | Automated performance degradation detection | ◆ | High | ☐ | Real-time monitoring dashboard, anomaly detection alerts |
|  | Post-Dep | Continuous monitoring planning | ★ | Med | ☐ | Regular performance evaluation schedule, designated personnel |
|  | Post-Dep | Real-time monitoring/anomaly detection for AI agent actions (Agentic AI) | ★ | High | ☐ | Real-time anomaly alerts, automatic shutdown mechanism |
| 8. Explainability | [Field] | [Considerations] | ◆ | High | ☐ | XAI techniques (imaging), evidence literature (drug interactions) |
| 9. Debiasing | Pre-Dev | Review of data representativeness | ★ | Med | ☐ | Data distribution analysis by gender, age, region |
|  | During | Review of labeling bias | ★ | Med | ☐ | Multi-reader consensus (imaging), cultural bias review (psychiatry) |
|  | During | Review of measurement tool bias | ◆ | Med | ☐ | Awareness and documentation of gold standard limitations |
|  | Pre-Dev | Bias training for researchers/devs | ◆ | Low | ☐ | AI fairness training completion |
|  | During | Data bias audit and correction | ★ | High | ☐ | Oversampling, weight adjustment techniques |
|  | During | Internal audit procedures | ◆ | Med | ☐ | Regular bias review meetings within dev team |
|  | Post-Dep | External audit procedures | ● | High | ☐ | Social review procedures (high-impact AI) |
|  | Post-Dep | Real-world bias verification | ★ | Med | ☐ | Performance gap monitoring based on real-use data |
| 10. Alignment (Priority) | 1st | Medical standards & evidence-based design | ★ | Med | ☐ | Clinical guideline-based design |
|  | 2nd | Patient safety, welfare, autonomy | ★ | Med | ☐ | Patient decision rights, information provision obligation |
|  | 3rd | Social values (equity, accessibility) | ◆ | Med | ☐ | Vulnerable population accessibility, healthcare inequality reduction |
|  | 4th | Stakeholder values (staff, patients) | ◆ | Med | ☐ | User requirements analysis, patient advisory panel |
|  | 5th | Efficient use of medical resources | ● | Low | ☐ | Cost-effectiveness analysis |

|  |  |  |  |  |  |  |
| --- | --- | --- | --- | --- | --- | --- |

***Multimedia Appendix 4.*** *Professional Field Distribution (Multiple Selections Allowed)*

| Professional Field | Round 2 (N=32) | Round 3 (N=27) |
| --- | --- | --- |
| Data Scientist | 10 (31.3%) | 6 (22.2%) |
| AI/ML Researcher or Developer | 9 (28.1%) | 7 (25.9%) |
| Non-AI Researcher (Humanities/Social) | 9 (28.1%) | 9 (33.3%) |
| Clinician | 7 (21.9%) | 6 (22.2%) |
| Bioethicist | 7 (21.9%) | 6 (22.2%) |
| Legal or Regulatory Expert | 5 (15.6%) | 4 (14.8%) |
| Healthcare Policy Researcher | 5 (15.6%) | 3 (11.1%) |
| IRB Expert or Member | 1 (3.1%) | 3 (11.1%) |

## Multimedia Appendix 5: Round 2 Item-Level Descriptive Statistics

## Detailed Item-Level Results (Round 2, N=32, 7-Point Likert Scale)

Note: Consensus criteria — High: IQR ≤ 1.5 AND CV < 0.5; Moderate: IQR ≤ 2.0 AND CV < 0.8; Low: IQR > 2.0 OR CV ≥ 0.8

### Domain 1. Data Protection — 7 Items

| Item | Question | Mean | Median | SD | IQR | CV | Min | Max | Consensus |
| --- | --- | --- | --- | --- | --- | --- | --- | --- | --- |
| Q1.1.1 | Differential Privacy | 5.50 | 5.5 | 1.17 | 1.25 | 0.213 | 3 | 7 | High |
| Q1.1.2 | Federated Learning | 5.29 | 6.0 | 1.15 | 1.00 | 0.218 | 2 | 7 | High |
| Q1.1.3 | Secure Multi-Party Computation | 5.61 | 6.0 | 1.13 | 1.00 | 0.202 | 3 | 7 | High |
| Q1.1.4 | Homomorphic Encryption | 5.54 | 6.0 | 0.88 | 1.00 | 0.159 | 3 | 7 | High |
| Q1.1.5 | Strict Data Access Protocol | **6.21** | 6.5 | 1.23 | 1.00 | 0.198 | 1 | 7 | High |
| Q1.1.6 | Network Segmentation | 5.68 | 6.0 | 1.47 | 2.00 | 0.258 | 2 | 7 | Moderate |
| Q1.1.7 | Third-Party Liability | 5.68 | 6.0 | 1.25 | 1.25 | 0.220 | 2 | 7 | High |
|  | **Domain Mean** | **5.64** |  | **0.63** | **1.21** |  |  |  | **High: 6/7** |

### Domain 2. Evaluation Methods — 6 Items

| Item | Question | Mean | Median | SD | IQR | CV | Min | Max | Consensus |
| --- | --- | --- | --- | --- | --- | --- | --- | --- | --- |
| Q1.2.1 | LLM-as-Judge | 5.43 | 5.5 | 1.03 | 1.00 | 0.190 | 3 | 7 | High |
| Q1.2.2 | Benchmark | 6.00 | 6.0 | 1.02 | 2.00 | 0.170 | 4 | 7 | Moderate |
| Q1.2.3 | Expert Validation | **6.29** | 6.0 | 0.90 | 1.00 | 0.143 | 3 | 7 | High |
| Q1.2.4 | Patient Validation | 5.11 | 5.0 | 1.31 | 1.25 | 0.257 | 2 | 7 | High |
| Q1.2.5 | Prompt Robustness | **6.21** | 6.0 | 0.74 | 1.00 | 0.119 | 5 | 7 | High |
| Q1.2.6 | Result Reproducibility | **6.11** | 6.0 | 0.99 | 1.00 | 0.163 | 2 | 7 | High |
|  | **Domain Mean** | **5.86** |  | **0.57** | **1.21** |  |  |  | **High: 5/6** |

### Domain 3. Safety Measures — 6 Items

| Item | Question | Mean | Median | SD | IQR | CV | Min | Max | Consensus |
| --- | --- | --- | --- | --- | --- | --- | --- | --- | --- |
| Q1.3.1 | Reliance Score | 5.82 | 6.0 | 1.28 | 2.00 | 0.220 | 2 | 7 | Moderate |
| Q1.3.2 | Uncertainty Quantification | 6.00 | 6.0 | 0.94 | 1.25 | 0.157 | 3 | 7 | High |
| Q1.3.3 | Decision Boundary | 5.86 | 6.0 | 1.01 | 2.00 | 0.172 | 4 | 7 | Moderate |
| Q1.3.4 | Explicit Explanation | **6.25** | 6.0 | 0.70 | 1.00 | 0.112 | 5 | 7 | High |
| Q1.3.5 | Clear Documentation | 6.04 | 6.0 | 0.64 | 0.00 | 0.106 | 5 | 7 | High |
| Q1.3.6 | Use Category Limitation | 5.75 | 6.0 | 1.00 | 1.00 | 0.175 | 3 | 7 | High |
|  | **Domain Mean** | **5.95** |  | **0.56** | **1.21** |  |  |  | **High: 4/6** |

### Domain 4. Documentation Standards — 5 Items

| Item | Question | Mean | Median | SD | IQR | CV | Min | Max | Consensus |
| --- | --- | --- | --- | --- | --- | --- | --- | --- | --- |
| Q2.2.1 | Model Card | **6.11** | 6.0 | 0.69 | 1.00 | 0.112 | 5 | 7 | High |
| Q2.2.2 | Data Source | **6.29** | 7.0 | 0.94 | 1.00 | 0.149 | 4 | 7 | High |
| Q2.2.3 | Bias Audit Report | 6.07 | 6.0 | 0.72 | 1.00 | 0.118 | 5 | 7 | High |
| Q2.2.4 | Data Security Plan | 6.04 | 6.0 | 1.00 | 2.00 | 0.166 | 4 | 7 | Moderate |
| Q2.2.5 | Continuous Monitoring Plan | 5.82 | 6.0 | 0.98 | 2.00 | 0.169 | 4 | 7 | Moderate |
|  | **Domain Mean** | **6.06** |  | **0.66** | **1.40** |  |  |  | **High: 3/5** |

### Domain 5. Liability Distribution — 6 Items

| Item | Question | Mean | Median | SD | IQR | CV | Min | Max | Consensus |
| --- | --- | --- | --- | --- | --- | --- | --- | --- | --- |
| Q2.3.1 | Principal Researcher | 5.43 | 6.0 | 1.35 | 1.00 | 0.248 | 2 | 7 | High |
| Q2.3.2 | Healthcare Professional | 5.25 | 5.5 | 1.32 | 2.00 | 0.252 | 3 | 7 | Moderate |
| Q2.3.3 | Developer | 5.25 | 6.0 | 1.24 | 2.00 | 0.235 | 2 | 7 | Moderate |
| Q2.3.4 | Institution | 5.14 | 6.0 | 1.60 | 2.00 | 0.312 | 2 | 7 | Moderate |
| Q2.3.5 | Funding Agency | 4.18 | 4.0 | 1.52 | 2.00 | 0.363 | 1 | 7 | Moderate |
| Q2.3.6 | Shared Responsibility Model | **6.18** | 7.0 | 1.28 | 1.00 | 0.207 | 3 | 7 | High |
|  | **Domain Mean** | **5.24** |  | **0.94** | **1.67** |  |  |  | **High: 2/6** |

### Domain 6. Monitoring Initiatives — 6 Items

| Item | Question | Mean | Median | SD | IQR | CV | Min | Max | Consensus |
| --- | --- | --- | --- | --- | --- | --- | --- | --- | --- |
| Q2.4.1 | Researcher Initiative | 5.79 | 6.0 | 0.88 | 0.25 | 0.151 | 3 | 7 | High |
| Q2.4.2 | Healthcare Professional | 5.36 | 6.0 | 1.64 | 1.25 | 0.306 | 1 | 7 | High |
| Q2.4.3 | Developer Initiative | 5.93 | 6.0 | 1.18 | 1.25 | 0.200 | 2 | 7 | High |
| Q2.4.4 | Institution Initiative | 5.57 | 6.0 | 1.17 | 1.00 | 0.210 | 2 | 7 | High |
| Q2.4.5 | Funding Agency | 4.54 | 5.0 | 1.50 | 2.00 | 0.331 | 1 | 7 | Moderate |
| Q2.4.6 | Shared Responsibility | 5.75 | 6.5 | 1.76 | 2.00 | 0.305 | 1 | 7 | Moderate |
|  | **Domain Mean** | **5.49** |  | **0.85** | **1.29** |  |  |  | **High: 4/6** |

### Domain 7. Explainability Requirements — 7 Items

| Item | Question | Mean | Median | SD | IQR | CV | Min | Max | Consensus |
| --- | --- | --- | --- | --- | --- | --- | --- | --- | --- |
| Q2.5.1 | Clinical Decision Support | **6.68** | 7.0 | 0.67 | 0.25 | 0.100 | 4 | 7 | **High** ★ |
| Q2.5.2 | Diagnosis Support | **6.57** | 7.0 | 0.57 | 1.00 | 0.087 | 5 | 7 | **High** ★ |
| Q2.5.3 | Clinical Test Support | 5.57 | 6.0 | 1.00 | 1.00 | 0.179 | 3 | 7 | High |
| Q2.5.4 | Surgery Support | 5.57 | 6.0 | 1.26 | 2.00 | 0.226 | 3 | 7 | Moderate |
| Q2.5.5 | Hospitalization Support | 5.36 | 5.5 | 1.28 | 1.00 | 0.239 | 2 | 7 | High |
| Q2.5.6 | Patient Monitoring | 5.71 | 6.0 | 1.38 | 2.00 | 0.242 | 2 | 7 | Moderate |
| Q2.5.7 | Hospital Administration | 4.46 | 5.0 | 1.73 | 3.00 | 0.388 | 1 | 7 | **Low** |
|  | **Domain Mean** | **5.70** |  | **0.86** | **1.46** |  |  |  | **High: 4/7** |

★ Highest-scoring items across all domains

### Domain 8. Bias Effects — 7 Items

Note: This domain used a 3-point ranking scale (1=most problematic, 3=least problematic), not a 7-point Likert scale.

| Item | Question | Mean | Median | SD | IQR | CV | Min | Max | Consensus |
| --- | --- | --- | --- | --- | --- | --- | --- | --- | --- |
| Q3.1.1 | Non-Representative Training Data | **2.82** | 3.0 | 0.48 | 0.00 | 0.169 | 1 | 3 | High |
| Q3.1.2 | Clinical Language Bias | 2.43 | 2.0 | 0.57 | 1.00 | 0.236 | 1 | 3 | High |
| Q3.1.3 | Textbook Bias | 2.29 | 2.0 | 0.71 | 1.00 | 0.312 | 1 | 3 | High |
| Q3.1.4 | Measurement Bias | 2.61 | 3.0 | 0.57 | 1.00 | 0.217 | 1 | 3 | High |
| Q3.1.5 | Human Labelling Bias | 2.71 | 3.0 | 0.53 | 0.25 | 0.197 | 1 | 3 | High |
| Q3.1.6 | Proxy Measure Bias | 2.39 | 2.0 | 0.50 | 1.00 | 0.208 | 2 | 3 | High |
| Q3.1.7 | Patient-Clinician Interaction Bias | 2.57 | 3.0 | 0.50 | 1.00 | 0.196 | 2 | 3 | High |
|  | **Domain Mean** | **2.55** |  | **0.23** | **0.75** |  |  |  | **High: 7/7** |

Note: Lower mean = higher perceived severity. Non-representative training data was rated as the most problematic bias source.

### Domain 9. Value Alignment Priorities — 6 Items

Note: This domain used a 6-point ranking scale (1=highest priority, 6=lowest priority), not a 7-point Likert scale.

| Item | Question | Mean | Median | SD | IQR | CV | Min | Max | Consensus |
| --- | --- | --- | --- | --- | --- | --- | --- | --- | --- |
| Q3.3.1 | Patient-Centered Value | **2.18** | 2.0 | 1.02 | 0.25 | 0.468 | 1 | 5 | High |
| Q3.3.2 | Medical Accuracy | **1.79** | 1.0 | 1.07 | 1.00 | 0.597 | 1 | 5 | Moderate |
| Q3.3.3 | Effectiveness | 5.11 | 6.0 | 1.20 | 1.25 | 0.234 | 2 | 6 | High |
| Q3.3.4 | Social Value | 4.00 | 4.0 | 1.05 | 1.25 | 0.264 | 2 | 6 | High |
| Q3.3.5 | Stakeholder Integration | 4.39 | 4.5 | 1.26 | 1.00 | 0.286 | 2 | 6 | High |
| Q3.3.6 | Value Balancing | 3.14 | 3.0 | 1.80 | 4.00 | 0.573 | 1 | 6 | **Low** |
|  | **Domain Mean** | **3.43** |  | **0.35** | **1.46** |  |  |  | **High: 4/6** |

Note: Lower mean = higher priority. Medical accuracy and patient-centered value were ranked as the highest priorities for AI value alignment.

### Summary Statistics

| Domain | N Items | Domain Mean | SD | High Consensus | Moderate | Low |
| --- | --- | --- | --- | --- | --- | --- |
| Documentation Standards | 5 | **6.06** | 0.66 | 3 (60%) | 2 (40%) | 0 |
| Safety Measures | 6 | **5.95** | 0.56 | 4 (67%) | 2 (33%) | 0 |
| Evaluation Methods | 6 | **5.86** | 0.57 | 5 (83%) | 1 (17%) | 0 |
| Explainability | 7 | **5.70** | 0.86 | 4 (57%) | 2 (29%) | 1 (14%) |
| Data Protection | 7 | **5.64** | 0.63 | 6 (86%) | 1 (14%) | 0 |
| Monitoring | 6 | **5.49** | 0.85 | 4 (67%) | 2 (33%) | 0 |
| Liability | 6 | **5.24** | 0.94 | 2 (33%) | 4 (67%) | 0 |
| Bias Effects† | 7 | 2.55 | 0.23 | 7 (100%) | 0 | 0 |
| Value Alignment† | 6 | 3.43 | 0.35 | 4 (67%) | 1 (17%) | 1 (17%) |
| **Total** | **56** | — | — | **39 (69.6%)** | **15 (26.8%)** | **2 (3.6%)** |

† Bias Effects and Value Alignment used ranking scales rather than 7-point Likert importance scales; domain means are not directly comparable with other domains.

# Multimedia Appendix 6: Round 3 Item-Level Descriptive Statistics

## Detailed Item-Level Results (Round 3, N=27, 7-Point Likert Scale)

Note: Round 3 applied strengthened consensus criteria — Strong Consensus: IQR ≤ 1.0 AND CV ≤ 0.2; IQR Consensus: IQR ≤ 1.0 only; CV Consensus: CV ≤ 0.2 only; No Consensus: neither criterion met. Round 3 comprised 43 items selected from Round 2 for further consensus refinement *operational sub-items derived from Round 1–2 discussions.*

### Q1. Verification Methods — 1 Item

| Item | Question | Mean | Median | SD | IQR | Q1 | Q3 | CV | IQR ≤ 1.0 | CV ≤ 0.2 |
| --- | --- | --- | --- | --- | --- | --- | --- | --- | --- | --- |
| Q1-1 | Verification Benchmark) | 5.67 | 6 | 1.27 | 1.5 | 5.0 | 6.5 | 0.224 | No | No |

### Q2. Patient Safety Measures — 2 Items

| Item | Question | Mean | Median | SD | IQR | Q1 | Q3 | CV | IQR ≤ 1.0 | CV ≤ 0.2 |
| --- | --- | --- | --- | --- | --- | --- | --- | --- | --- | --- |
| Q2-1 | AI Output Reliance Score | 5.85 | 6 | 0.60 | 0.5 | 5.5 | 6.0 | 0.103 | **Yes** | **Yes** |
| Q2-2 | Decision Boundary Setting | **6.26** | 6 | 0.86 | 1.0 | 6.0 | 7.0 | 0.137 | **Yes** | **Yes** |

### Q3. Documentation Standards — 2 Items

| Item | Question | Mean | Median | SD | IQR | Q1 | Q3 | CV | IQR ≤ 1.0 | CV ≤ 0.2 |
| --- | --- | --- | --- | --- | --- | --- | --- | --- | --- | --- |
| Q3-1 | Data Security Plan | 5.93 | 6 | 1.04 | 2.0 | 5.0 | 7.0 | 0.175 | No | **Yes** |
| Q3-2 | Continuous Monitoring Plan | 5.63 | 6 | 0.97 | 1.0 | 5.0 | 6.0 | 0.172 | **Yes** | **Yes** |

### Q4. Liability Attribution — 3 Items

| Item | Question | Mean | Median | SD | IQR | Q1 | Q3 | CV | IQR ≤ 1.0 | CV ≤ 0.2 |
| --- | --- | --- | --- | --- | --- | --- | --- | --- | --- | --- |
| Q4-1 | Healthcare Professional-Led | 5.56 | 6 | 1.01 | 1.0 | 5.0 | 6.0 | 0.182 | **Yes** | **Yes** |
| Q4-2 | Institution-Led | 5.59 | 6 | 1.15 | 1.0 | 5.0 | 6.0 | 0.206 | **Yes** | No |
| Q4-3 | Developer-Led | 5.11 | 5 | 1.25 | 2.0 | 4.0 | 6.0 | 0.245 | No | No |

### Q5. Shared Responsibility Model — 1 Item

| Item | Question | Mean | Median | SD | IQR | Q1 | Q3 | CV | IQR ≤ 1.0 | CV ≤ 0.2 |
| --- | --- | --- | --- | --- | --- | --- | --- | --- | --- | --- |
| Q5-1 | Shared Responsibility Model | 5.96 | 6 | 0.98 | 1.5 | 5.5 | 7.0 | 0.164 | No | **Yes** |

### Q6. Explainability Application Areas — 3 Items

| Item | Question | Mean | Median | SD | IQR | Q1 | Q3 | CV | IQR ≤ 1.0 | CV ≤ 0.2 |
| --- | --- | --- | --- | --- | --- | --- | --- | --- | --- | --- |
| Q6-1 | Surgery Support | 5.74 | 6 | 0.90 | 1.0 | 5.0 | 6.0 | 0.157 | **Yes** | **Yes** |
| Q6-2 | Patient Monitoring Support | 5.89 | 6 | 0.85 | 1.5 | 5.0 | 6.5 | 0.144 | No | **Yes** |
| Q6-3 | Hospital Administration | 4.74 | 5 | 1.20 | 2.0 | 4.0 | 6.0 | 0.252 | No | No |

### Q7. Emerging Ethical Issues — 10 Items

| Item | Question | Mean | Median | SD | IQR | Q1 | Q3 | CV | IQR ≤ 1.0 | CV ≤ 0.2 |
| --- | --- | --- | --- | --- | --- | --- | --- | --- | --- | --- |
| Q7-1 | Human Override Priority | 5.93 | 6 | 1.07 | 1.5 | 5.5 | 7.0 | 0.181 | No | **Yes** |
| Q7-2 | Preventing Hypersuasion | 5.52 | 6 | 0.98 | 1.0 | 5.0 | 6.0 | 0.177 | **Yes** | **Yes** |
| Q7-3 | **Explainable AI** | **6.48** | 6 | 0.51 | 1.0 | 6.0 | 7.0 | 0.079 | **Yes** | **Yes** |
| Q7-4 | **Human-in-the-Loop** | **6.33** | 6 | 0.73 | 1.0 | 6.0 | 7.0 | 0.116 | **Yes** | **Yes** |
| Q7-5 | Mitigating Deskilling | 5.37 | 6 | 1.21 | 1.0 | 5.0 | 6.0 | 0.226 | **Yes** | No |
| Q7-6 | Preventing Research Trust Erosion | 5.78 | 6 | 0.85 | 1.0 | 5.0 | 6.0 | 0.147 | **Yes** | **Yes** |
| Q7-7 | Healthcare Governance Committee | 5.93 | 6 | 0.96 | 2.0 | 5.0 | 7.0 | 0.162 | No | **Yes** |
| Q7-8 | Healthcare AI Literacy | 5.78 | 6 | 0.85 | 0.5 | 5.5 | 6.0 | 0.147 | **Yes** | **Yes** |
| Q7-9 | Clinical Workflow vs AI Innovation | 5.48 | 6 | 0.75 | 1.0 | 5.0 | 6.0 | 0.137 | **Yes** | **Yes** |
| Q7-10 | Third-Party Data/Platform Use | 5.07 | 5 | 0.83 | 1.0 | 5.0 | 6.0 | 0.163 | **Yes** | **Yes** |

Q7-3 (Explainable AI) and Q7-4 (Human-in-the-Loop) achieved the highest scores among all emerging ethical issues.

### Q8-1. Expert Verification Participation Stages, Multiple Selection

| Item | Participation Stage | N | % |
| --- | --- | --- | --- |
| Q8-1-3 | Validation Stage | 21 | 77.8% |
| Q8-1-1 | Development Stage | 20 | 74.1% |
| Q8-1-4 | Pre-deployment | 16 | 59.3% |
| Q8-1-5 | Post-deployment | 16 | 59.3% |
| Q8-1-2 | Training Stage | 12 | 44.4% |

Note: Multiple selections allowed. Results indicate experts prioritize involvement during performance evaluation and algorithm design phases.

### Q8-2. Expert Verification Qualifications — 4 Items

| Item | Question | Mean | Median | SD | IQR | Q1 | Q3 | CV | IQR ≤ 1.0 | CV ≤ 0.2 |
| --- | --- | --- | --- | --- | --- | --- | --- | --- | --- | --- |
| Q8-2-1 | Clinical Specialty Qualification | 6.00 | 6 | 1.21 | 2.0 | 5.0 | 7.0 | 0.201 | No | No |
| Q8-2-2 | AI/ML Technical Understanding | 5.78 | 6 | 1.12 | 2.0 | 5.0 | 7.0 | 0.194 | No | **Yes** |
| Q8-2-3 | Medical AI Evaluation Training | 5.44 | 6 | 1.40 | 1.0 | 5.0 | 6.0 | 0.256 | **Yes** | No |
| Q8-2-4 | Research Ethics Training | 5.63 | 6 | 1.39 | 0.5 | 5.5 | 6.0 | 0.247 | **Yes** | No |

### Q9-1. IRB Review Elements — 5 Items

| Item | Question | Mean | Median | SD | IQR | Q1 | Q3 | CV | IQR ≤ 1.0 | CV ≤ 0.2 |
| --- | --- | --- | --- | --- | --- | --- | --- | --- | --- | --- |
| Q9-1-1 | Model Design & Data Adequacy | 6.11 | 6 | 1.01 | 1.5 | 5.5 | 7.0 | 0.166 | No | **Yes** |
| Q9-1-2 | Protocol Validity | 6.15 | 6 | 0.99 | 1.5 | 5.5 | 7.0 | 0.161 | No | **Yes** |
| Q9-1-3 | Output Verification & Monitoring | **6.33** | 6 | 0.78 | 1.0 | 6.0 | 7.0 | 0.124 | **Yes** | **Yes** |
| Q9-1-4 | Informed Consent Process | 6.04 | 6 | 0.90 | 2.0 | 5.0 | 7.0 | 0.149 | No | **Yes** |
| Q9-1-5 | Deployment & Maintenance System | 5.63 | 6 | 0.97 | 1.0 | 5.0 | 6.0 | 0.172 | **Yes** | **Yes** |

### Q10-1. Bias Type Management Priority — 6 Items

| Item | Question | Mean | Median | SD | IQR | Q1 | Q3 | CV | IQR ≤ 1.0 | CV ≤ 0.2 |
| --- | --- | --- | --- | --- | --- | --- | --- | --- | --- | --- |
| Q10-1-1 | Demographic Bias | 5.78 | 6 | 1.05 | 0.5 | 5.5 | 6.0 | 0.182 | **Yes** | **Yes** |
| Q10-1-2 | Socioeconomic Bias | 5.56 | 6 | 1.40 | 3.0 | 4.0 | 7.0 | 0.251 | No | No |
| Q10-1-3 | Disease Type Bias | 5.56 | 6 | 1.09 | 1.0 | 5.0 | 6.0 | 0.195 | **Yes** | **Yes** |
| Q10-1-4 | Data Collection Bias | 5.78 | 6 | 1.42 | 2.0 | 5.0 | 7.0 | 0.246 | No | No |
| Q10-1-5 | Historical Bias | 5.37 | 6 | 1.18 | 1.0 | 5.0 | 6.0 | 0.220 | **Yes** | No |
| Q10-1-6 | Algorithmic Bias | **6.00** | 6 | 0.92 | 2.0 | 5.0 | 7.0 | 0.153 | No | **Yes** |

### Q10-2. Bias Mitigation Strategies — 6 Items

| Item | Question | Mean | Median | SD | IQR | Q1 | Q3 | CV | IQR ≤ 1.0 | CV ≤ 0.2 |
| --- | --- | --- | --- | --- | --- | --- | --- | --- | --- | --- |
| Q10-2-1 | **Training Data Diversity** | **6.44** | 7 | 0.70 | 1.0 | 6.0 | 7.0 | 0.108 | **Yes** | **Yes** |
| Q10-2-2 | Regular Bias Monitoring | 5.89 | 6 | 1.09 | 1.0 | 6.0 | 7.0 | 0.184 | **Yes** | **Yes** |
| Q10-2-3 | Bias Mitigation Algorithms | 5.70 | 6 | 1.10 | 0.0 | 6.0 | 6.0 | 0.193 | **Yes** | **Yes** |
| Q10-2-4 | Multidisciplinary Expert Review | 5.85 | 6 | 1.10 | 2.0 | 5.0 | 7.0 | 0.188 | No | **Yes** |
| Q10-2-5 | Transparency & Explainability | **6.22** | 6 | 0.85 | 1.0 | 6.0 | 7.0 | 0.136 | **Yes** | **Yes** |
| Q10-2-6 | User Education & Guidelines | 5.59 | 6 | 1.19 | 1.0 | 5.0 | 6.0 | 0.212 | **Yes** | No |

Q10-2-1 (Training Data Diversity) achieved the highest score among all bias mitigation strategies and the highest score in the entire Round 3 survey.
